# Supplementary material for: The Reduction in Gastric Atrophy after Helicobacter pylori Eradication Is Reduced by Treatment with Inhibitors of Gastric Acid Secretion
Source: MDPI journal article supplement (doi:10.3390/ijms20081913), 2019-04-18
Supplement: s1 [file s1]

**Supplementary Table S1. Association between changes in atrophy score and CDX1 expression (N = 23)**

| Atrophy change  | CDX1 expression, mean $\pm$ SD |                   | P value        |
|-----------------|--------------------------------|-------------------|----------------|
|                 | Initial assessment             | Final assessment  |                |
| Improvement     |                                |                   |                |
| Antrum (N = 12) | 0.099 $\pm$ 0.106              | 0.034 $\pm$ 0.060 | 0.136          |
| Corpus (N = 7)  | 0.093 $\pm$ 0.113              | 0.056 $\pm$ 0.072 | 0.564          |
| Exacerbation    |                                |                   |                |
| Antrum (N = 1)  | 0.491                          | 0.015             | Not applicable |
| Corpus (N = 3)  | 0.009 $\pm$ 0.007              | 0.120 $\pm$ 0.123 | 0.258          |

Improvement and exacerbation were defined as a decrease and increase, respectively, in the updated Sydney system score between the first and final biopsies.

**Supplementary Table S2. Association between changes in the atrophy score and CDX2 expression (N = 39).**

| Atrophy change  | CDX2 expression, mean ± SD |                  | P-value |
|-----------------|----------------------------|------------------|---------|
|                 | Initial assessment         | Final assessment |         |
| Improvement     |                            |                  |         |
| Antrum (N = 19) | 0.071 ± 0.120              | 0.054 ± 0.160    | 0.636   |
| Corpus (N = 12) | 0.076 ± 0.142              | 0.090 ± 0.202    | 0.807   |
| Exacerbation    |                            |                  |         |
| Antrum (N = 2)  | 0.316 ± 0.440              | 0.100 ± 0.041    | 0.637   |
| Corpus (N = 6)  | 0.012 ± 0.009              | 0.102 ± 0.159    | 0.222   |

Improvement and exacerbation were defined as a decrease and increase, respectively, in the updated Sydney system score between the first and final biopsies.

**Supplementary Table S3. Association between changes in the metaplasia score and incomplete metaplasia (N = 63).**

| Metaplasia change | Case with incomplete metaplasia |                  | P-value |
|-------------------|---------------------------------|------------------|---------|
|                   | Initial assessment              | Final assessment |         |
| Improvement       |                                 |                  |         |
| Antrum (N = 25)   | 8 (32.00%)                      | 3 (12.00 %)      | 0.215   |
| Corpus (N = 11)   | 5 (45.45%)                      | 4 (36.36 %)      | 1.000   |
| Exacerbation      |                                 |                  |         |
| Antrum (N = 21)   | 4 (19.05%)                      | 11 (52.38%)      | 0.090   |
| Corpus (N = 6)    | 3 (50.00%)                      | 1 (16.67%)       | 1.000   |

**Supplementary Table S4. GSRS symptom scores 3 months after eradication (N = 65)**

| GSRS score item                                                                                                            | GSRS score         |                  | P-value      |
|----------------------------------------------------------------------------------------------------------------------------|--------------------|------------------|--------------|
|                                                                                                                            | Initial assessment | Final assessment |              |
| GSRS1: Have you been bothered by PAIN OR DISCOMFORT IN YOUR UPPER ABDOMEN OR THE PIT OF YOUR STOMACH during the past week? | 1.673 ± 1.167      | 1.354 ± 0.758    | <b>0.004</b> |
| GSRS2: Have you been bothered by HEARTBURN during the past week?                                                           | 1.635 ± 1.048      | 1.291 ± 0.582    | <b>0.018</b> |
| GSRS3: Have you been bothered by ACID REFLUX during the past week?                                                         | 1.519 ± 0.918      | 1.400 ± 0.707    | 0.376        |
| GSRS4: Have you been bothered by HUNGER PAINS in the stomach during the past week?                                         | 1.481 ± 0.779      | 1.208 ± 0.504    | <b>0.002</b> |
| GSRS5: Have you been bothered by NAUSEA during the past week?                                                              | 1.423 ± 1.144      | 1.271 ± 0.707    | 0.236        |
| GSRS6: Have you been bothered by RUMBLING in your stomach during the past week?                                            | 1.500 ± 0.804      | 1.979 ± 1.280    | <b>0.007</b> |
| GSRS7: Has your stomach felt BLOATED during the past week?                                                                 | 1.712 ± 1.177      | 1.458 ± 0.651    | <b>0.025</b> |
| GSRS8: Have you been bothered by                                                                                           | 1.481 ± 1.038      | 1.480 ± 0.799    | 0.490        |

BURPING during the past week?

---

GSRs, gastrointestinal related gastrointestinal symptom rating scale

**Bold**, statistical significance.

**Supplementary Table 5. GSRS symptom scores for all observational periods after eradication during all follow-up periods (N = 52)**

| GSRS score item                                                                                                            | GSRS score      |                  | P-value |
|----------------------------------------------------------------------------------------------------------------------------|-----------------|------------------|---------|
|                                                                                                                            | Pre-eradication | Post-eradication |         |
| GSRS1: Have you been bothered by PAIN OR DISCOMFORT IN YOUR UPPER ABDOMEN OR THE PIT OF YOUR STOMACH during the past week? | 1.600 ± 1.087   | 1.577 ± 1.273    | 0.501   |
| GSRS2: Have you been bothered by HEARTBURN during the past week?                                                           | 1.538 ± 0.969   | 1.750 ± 1.100    | 0.572   |
| GSRS3: Have you been bothered by ACID REFLUX during the past week?                                                         | 1.462 ± 0.849   | 1.519 ± 0.851    | 1.000   |
| GSRS4: Have you been bothered by HUNGER PAINS in the stomach during the past week?                                         | 1.431 ± 0.749   | 1.442 ± 0.873    | 0.542   |
| GSRS5: Have you been bothered by NAUSEA during the past week?                                                              | 1.369 ± 1.039   | 1.481 ± 0.980    | 0.920   |
| GSRS6: Have you been bothered by RUMBLING in your stomach during the past week?                                            | 1.538 ± 0.885   | 1.827 ± 1.133    | 0.236   |
| GSRS7: Has your stomach felt BLOATED during the past week?                                                                 | 1.692 ± 1.131   | 1.673 ± 0.833    | 0.442   |
| GSRS8: Have you been bothered by                                                                                           | 1.554 ± 1.061   | 1.673 ± 1.184    | 0.646   |

BURPING during the past week?

---

**GSRS**, gastrointestinal related gastrointestinal symptom rating scale
